# Supplementary material for: W18O49/N-doped reduced graphene oxide hybrid architectures for full-spectrum photocatalytic degradation of organic contaminants in water
Source: Royal Society of Chemistry journal article supplement (doi:10.1039/d0tc05511e), 2020-12-23
Supplement: d0tc05511e1.pdf [file d0tc05511e1.pdf]

Supporting information

**W<sub>18</sub>O<sub>49</sub>/N-doped reduced graphene oxide hybrid architectures for full-spectrum photocatalytic degradation of organic contaminants in water**

*Jia Wang,<sup>a#</sup> Xiaochen Fang,<sup>a,b#</sup> Yue Liu,<sup>a</sup> Ming-Peng Zhuo,<sup>a,b\*</sup> Mu-Dan Yao,<sup>a</sup> Su-Lei Fu,<sup>c</sup> Zuoshan Wang,<sup>d\*</sup> Weifan Chen,<sup>a\*</sup> Liang-Sheng Liao<sup>b</sup>*

<sup>a</sup> School of Materials Science & Engineering, Nanchang University, Nanchang, Jiangxi 330031, China.

<sup>b</sup> Jiangsu Key Laboratory for Carbon-Based Functional Materials & Devices, Institute of Functional Nano & Soft Materials (FUNSOM), Soochow University, Suzhou, Jiangsu 215123, China

<sup>c</sup> Key Laboratory of Advanced Materials (MOE), School of Materials Science and Engineering, Tsinghua University, Beijing 100084, China

<sup>d</sup> College of Chemistry, Chemical Engineering and Materials Science, Soochow University, Suzhou, Jiangsu 215123, China.

Authors to whom correspondence should be addressed: [chenweifan@ncu.edu.cn](mailto:chenweifan@ncu.edu.cn) (W. F. Chen); [mpzhuo@suda.edu.cn](mailto:mpzhuo@suda.edu.cn) (M. P. Zhuo); [zuoshanwang@suda.edu.cn](mailto:zuoshanwang@suda.edu.cn) (Z. S. Wang).

#These authors contributed equally to this work.

## Experimental details

### Materials

All the chemicals are analytical grade and can be used without further purification, including crystalline flake graphite (C), hydrochloric acid (HCl), sulfuric acid (H<sub>2</sub>SO<sub>4</sub>), sodium nitrate (NaNO<sub>3</sub>), potassium permanganate (KMnO<sub>4</sub>), hydrogen peroxide solution (H<sub>2</sub>O<sub>2</sub>), ammonium nitrate (NH<sub>4</sub>NO<sub>3</sub>), glycine (C<sub>2</sub>H<sub>5</sub>NO<sub>2</sub>), ammonium metatungstate [(NH<sub>4</sub>)<sub>6</sub>H<sub>2</sub>W<sub>12</sub>O<sub>40</sub>·H<sub>2</sub>O, AMT] and rhodamine B (RhB). Dialysis bags were used during the synthesis process of graphene oxide.

### Measurements

The phase composition of the samples will be analyzed by X-ray diffractometer (XRD, Bruker D8 Advance) with Cu K $\alpha$  radiation ( $\lambda=0.154\ 05\ \text{nm}$ ). The morphologies of different samples were characterized on a field emission scanning electron microscopy (SEM, FEI Quanta200F). The microstructures of the samples were observed by transmission electron microscopy (TEM, JEOL JEM-2100). The elemental composition of the sample surface and the W4f binding energy were determined by X-ray photoelectron spectroscopy (XPS). On the other hand, the  $\zeta$  potential of the sample with 250 mg/L concentration was measured by a Malvern Zetasizer instrument (Nano S90, Malvern Instruments Ltd.) at 30 °C. The photocurrent of the samples under UV, Vis and NIR were recorded at a basic of 0 V versus the reference electrode, which could be obtained by an electrochemical workstation. During the test process, an ITO glass coated with W<sub>18</sub>O<sub>49</sub>/N-rGO was used as working electrode, the Pt and Na<sub>2</sub>SO<sub>4</sub> solution (0.5 mol/L) were acted as reference electrode and electrolyte respectively. The photoluminescence property of products was evaluated by fluorescence spectrometer (FLS 1000) with an excitation wavelength of 270 nm and a scanning wavelength range of 300-800 nm.

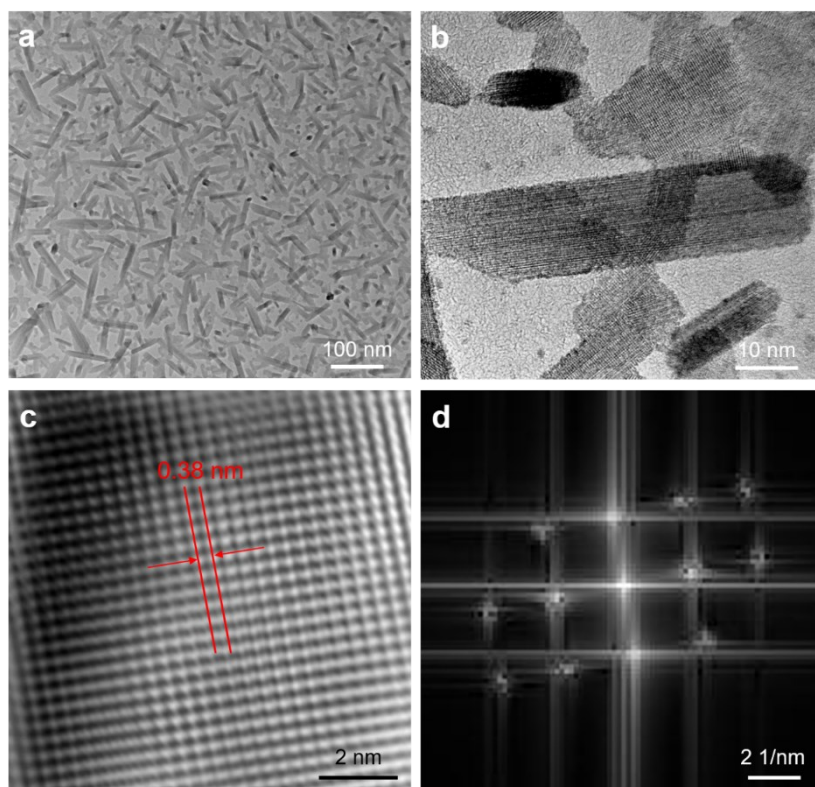

**Figure S1.** (a) The low-magnification TEM image of the as-prepared  $W_{18}O_{49}$ . (b) The high-magnification TEM image of the as-prepared  $W_{18}O_{49}/N-rGO$ . (c) The HRTEM image of one typical  $W_{18}O_{49}$  with the scale bar of 2 nm. (d) The corresponding SAED of  $W_{18}O_{49}$  in (c).

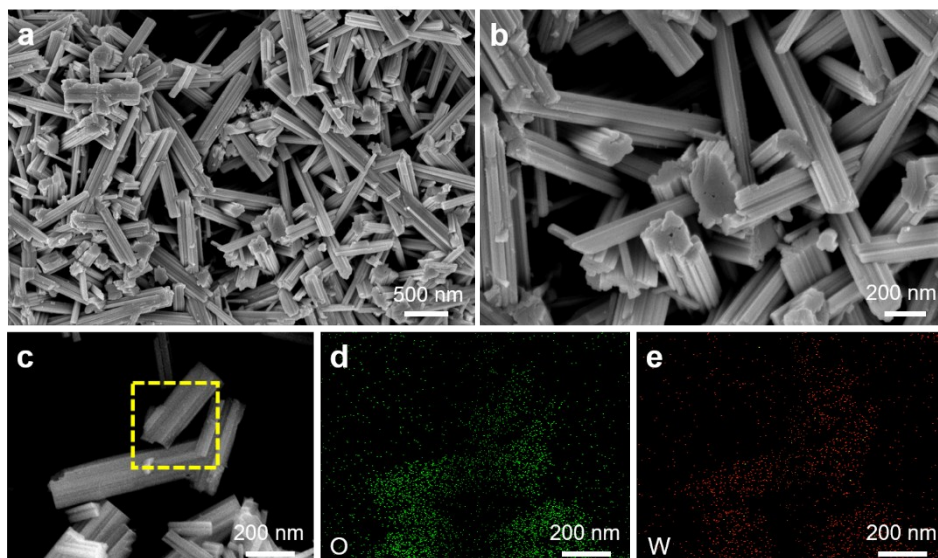

**Figure S2.** The SEM images (a-c) and Energy-dispersive x-ray spectroscopy (EDS) mappings of (d) O, and (e) W of synthesized  $W_{18}O_{49}$ .

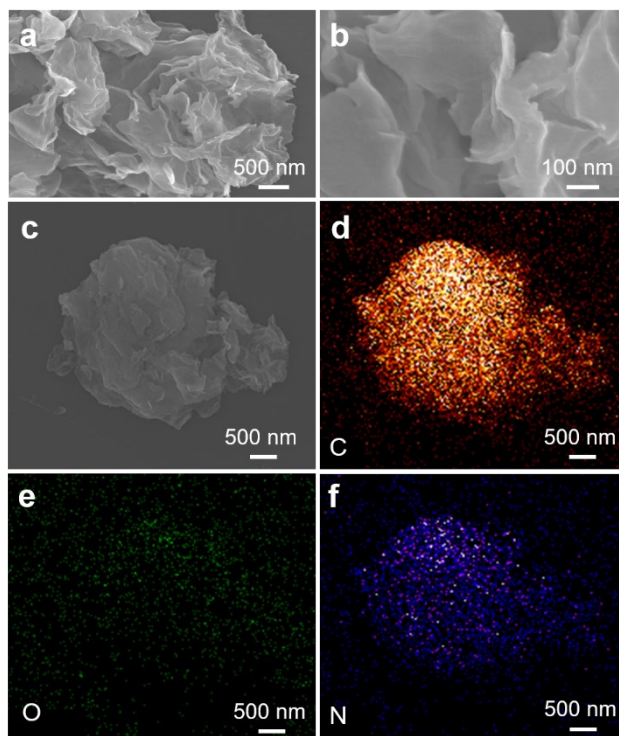

**Figure S3.** The SEM images (a-c) and the EDS mappings of (d) C, (e) O, (f) N of synthesized N-rGO.

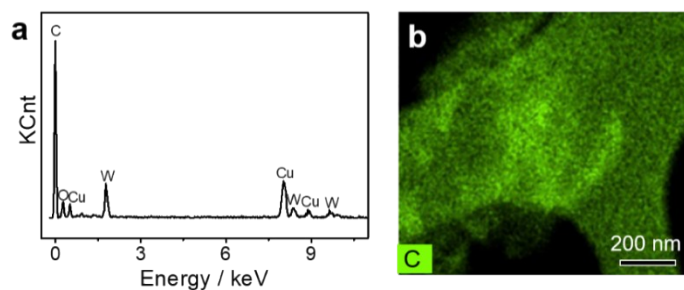

**Figure S4.** (a) The EDX spectrum of  $W_{18}O_{49}/N-rGO$ . (b) The elemental mapping (C element) of  $W_{18}O_{49}/N-rGO$ .

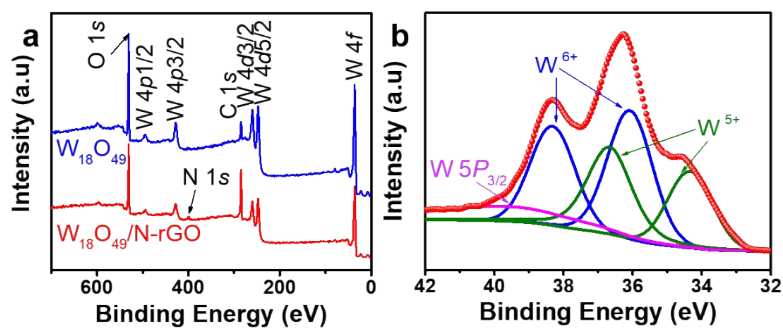

**Figure S5.** (a) Full range XPS spectra of  $W_{18}O_{49}$  and  $W_{18}O_{49}/N-rGO$ . (b) The W4f core level XPS spectra of  $W_{18}O_{49}$ .

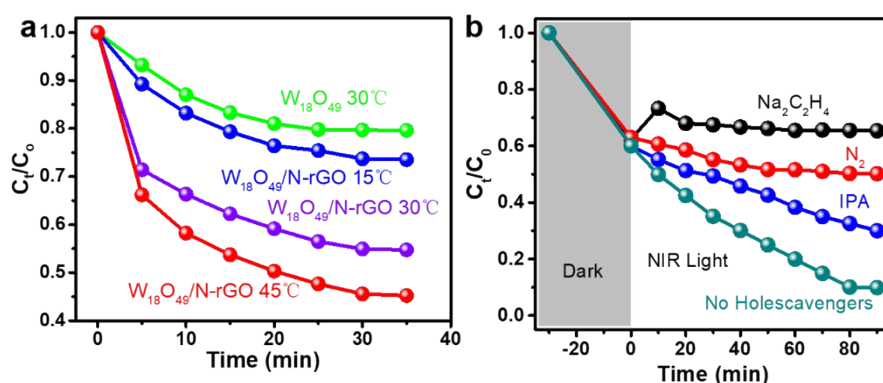

**Figure S6.** (a) The time-dependent adsorption curve of RhB degraded by the  $W_{18}O_{49}/N-rGO$  at different temperature of 15, 30 and 45 °C, and that of the  $W_{18}O_{49}$  sample at 30 °C. (b) The effects of different active species scavengers on the degradation rate of RhB by  $W_{18}O_{49}/N-rGO$  under NIR irradiation.

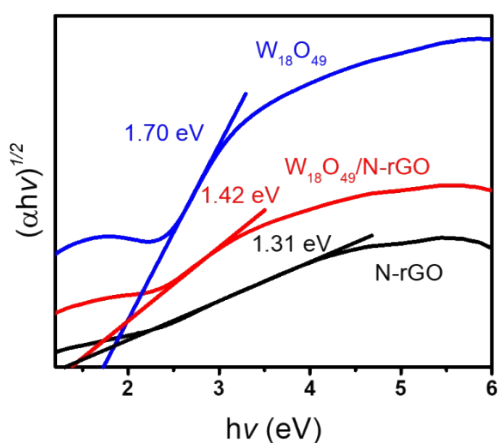

**Figure S7.** Tauc plots  $[(\alpha hv)^{1/2}$  vs.  $h\nu$ ] of N-rGO,  $W_{18}O_{49}$  and  $W_{18}O_{49}/N-rGO$ .

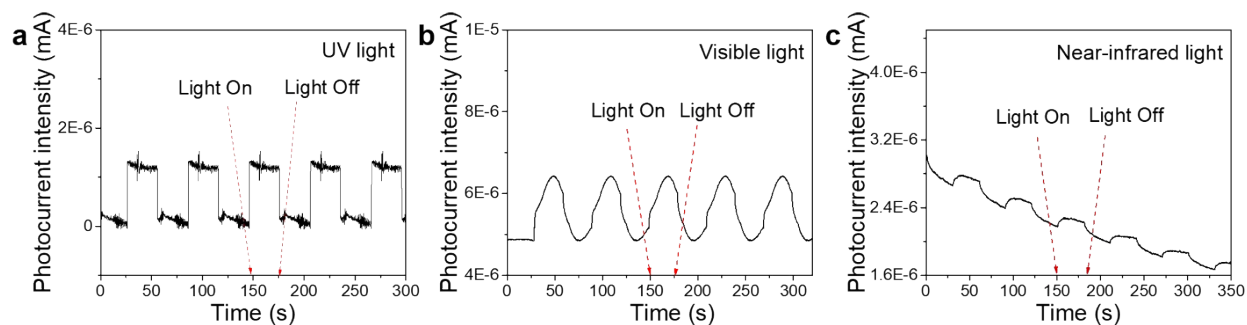

**Figure S8.** The photocurrent response of  $W_{18}O_{49}/N-rGO$  under UV light (a), Visible light (b), and Near-infrared light (c).

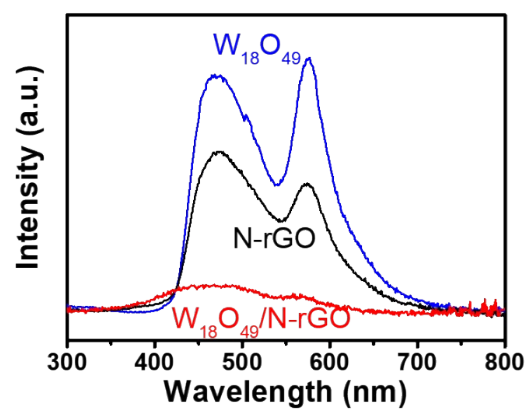

**Figure S9.** Photoluminescence spectrum of N-rGO (black line),  $W_{18}O_{49}$  nanorods (blue line) and  $W_{18}O_{49}/N-rGO$  hybrid nanomaterials (red line) with the excitation wavelength of 270 nm.
